# Supplementary material for: Reasons for late presentation to HIV care in Switzerland
Source: PubMed Central journal article supplement (PMC4653319; doi:10.7448/ias.18.1.20317), 2015-11-18
Supplement: JIAS-18-20317-s001.pdf [file JIAS-18-20317-s001.pdf]

1 **Supplementary Table 1: Comparison of baseline characteristics between survey**  
 2 **participants and non-participants**

|                                             | Questionnaire<br>available<br>(N=766) | Questionnaire<br>unavailable<br>(N=303) | Total<br>(N=1,069) | P-value |
|---------------------------------------------|---------------------------------------|-----------------------------------------|--------------------|---------|
| Female (%)                                  | 190 (24.8)                            | 91 (30.0)                               | 281 (26.3)         | 0.08    |
| Median age in years<br>(IQR)                | 40.5 (32.4 - 47.8)                    | 38.4 (31.5 - 45.9)                      | 40.0 (32.2-47.4)   | 0.02    |
| Median first CD4-count in<br>cells/μl (IQR) | 300 (171-455)                         | 280 (144-449)                           | 287 (154-449)      | 0.25    |
| MSM transmission group<br>(%)               | 374 (48.8)                            | 137 (45.2)                              | 511 (47.8)         | 0.63    |
| Region of origin (%)                        |                                       |                                         |                    | <0.01   |
| S and NW Europe                             | 542 (71.0)                            | 179 (59.0)                              | 721 (67.6)         |         |
| Sub-Saharan Africa                          | 117 (15.3)                            | 52 (17.2)                               | 169 (15.9)         |         |
| S and E Asia                                | 38 (5.0)                              | 24 (7.9)                                | 62 (5.8)           |         |
| Other                                       | 66 (8.7)                              | 48 (15.8)                               | 410 (38.4)         |         |
| High-level education (%)                    | 298 (39.0)                            | 112 (37.0)                              | 410 (38.4)         | 0.19    |

3 IQR: interquartile range, MSM: men who have sex with men; S: South; NW: Northwest; E: East

4  
5  
6  
7  
8  
9  
10  
11  
12  
13  
14  
15  
16  
17  
18  
19  
20  
21  
22  
23  
24  
25

26 **Supplementary Table 2: Behavioral and clinical determinants of late presentation to care**  
 27 **according to questionnaire data, after exclusion of patients with low ambiguity score**

|                                                           | Late Presenters | Non-Late Presenters | Total      | P-value |
|-----------------------------------------------------------|-----------------|---------------------|------------|---------|
| First positive test during hospitalization (%)            | 93 (22.1)       | 22 (8.3)            | 115 (16.8) | <0.001  |
| Place of infection (%)                                    |                 |                     |            | <0.001  |
| Switzerland                                               | 153 (38.5)      | 138 (55.4)          | 291 (45.1) |         |
| Abroad                                                    | 138 (34.8)      | 76 (30.5)           | 214 (33.1) |         |
| Unknown                                                   | 106 (26.7)      | 35 (14.1)           | 141 (21.8) |         |
| Remembers specific risk situation (%)                     | 130 (33.1)      | 126 (50.6)          | 256 (39.9) | <0.001  |
| Stable relationship (%) *                                 | 243 (61.2)      | 133 (52.8)          | 376 (57.9) | 0.03    |
| Occasional sex partners (%)*                              | 194 (49.5)      | 154 (61.9)          | 348 (54.3) | 0.002   |
| Inconsistent condom use (%)*                              | 278 (80.3)      | 173 (75.6)          | 451 (78.4) | 0.17    |
| <u>Symptoms</u> **                                        |                 |                     |            |         |
| At least 1 symptom                                        | 304 (72.2)      | 177 (66.8)          | 481 (70.1) | 0.13    |
| Fatigue                                                   | 146 (34.7)      | 71 (26.8)           | 217 (32.6) | 0.03    |
| Fever                                                     | 102 (24.2)      | 73 (27.6)           | 175 (25.5) | 0.33    |
| Weight loss                                               | 118 (28.0)      | 26 (9.8)            | 144 (21.0) | <0.001  |
| Respiratory infection                                     | 88 (20.9)       | 46 (17.4)           | 134 (19.5) | 0.25    |
| Skin lesions                                              | 83 (19.7)       | 28 (10.6)           | 111 (16.2) | 0.002   |
| Diarrhea                                                  | 67 (15.9)       | 34 (12.8)           | 101 (14.7) | 0.27    |
| Lymphadenopathy                                           | 61 (14.5)       | 45 (17.0)           | 106 (15.5) | 0.38    |
| Oral lesions                                              | 58 (13.8)       | 19 (7.2)            | 77 (11.2)  | 0.01    |
| Muscle pain                                               | 42 (10.0)       | 24 (9.1)            | 66 (9.6)   | 0.69    |
| At least 1 of fatigue, weight loss, oral- or skin lesions | 211 (50.1)      | 102 (38.5)          | 313 (45.6) | 0.003   |
| Had a GP at time of diagnosis                             | 257 (64.7)      | 173 (68.9)          | 430 (66.4) | 0.27    |
| Consultation for symptoms                                 | 190 (75.1)      | 108 (72.8)          | 298 (74.3) | 0.64    |

28 \* During the 6 months before diagnosis

29 \*\* During the 12 months before diagnosis

30 GP: general practitioner

31

32

33
